# Supplementary material for: Hexafluoroisopropyl alcohol mediated synthesis of 2,3-dihydro-4H-pyrido[1,2-a]pyrimidin-4-ones
Source: PubMed Central journal article supplement (PMC5090868; doi:10.1038/srep36316), 2016-11-02

## Hexafluoroisopropyl alcohol mediated synthesis of 2,3-dihydro-4H-pyrido[1,2-a]pyrimidin-4-ones

Mohammad A. Alam,\* Zakeyah Alsharif<sup>a</sup>, Hessa Alkhattabi<sup>a</sup>, Derika Jones<sup>a</sup>, Evan Delancey<sup>a</sup>, Adam Gottsponer<sup>a</sup>, Tianhong Yang<sup>b</sup>

<sup>a</sup> Department of Chemistry and Physics, College of Science and Mathematics, Arkansas State University, Jonesboro, AR 72467

<sup>b</sup> Molecular Biosciences Graduate Program, Arkansas State University, Jonesboro, AR 72467

\*corresponding author

Mohammad A Alam

E-mail: [malam@astate.edu](mailto:malam@astate.edu), Tel: +1-870-973-3319

### Materials and instrumentation

All commercial chemicals and solvents are reagent grade and were used without further treatment unless otherwise noted. <sup>1</sup>H NMR spectra were obtained with a Varian Mercury-300MHz with TMS as internal standard. <sup>13</sup>C NMR spectra were obtained with a Varian Mercury-75MHz with TMS as internal standard. <sup>13</sup>C NMR were obtained by proton-decoupled data. IR spectra were recorded in Thermo Scientific NICOLET IS10. The ESI-FTMS Mass spectra were recorded Bruker ApexII-FTMS system. Low resolution mass spectra were recorded in Shimadzu QQQ instrument and LTQ-XL mass spectrometer. Melting points were recorded in MP 50 melting point system.

$^1\text{H}$  NMR spectrum of **2**

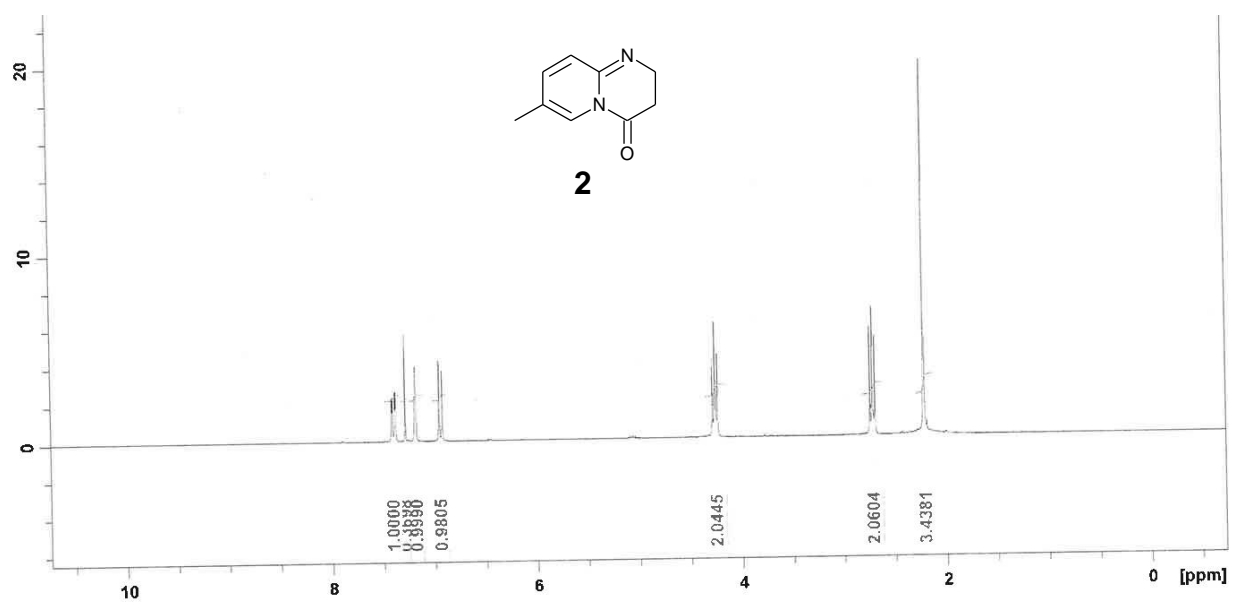

$^{13}\text{C}$  NMR spectrum of **2**

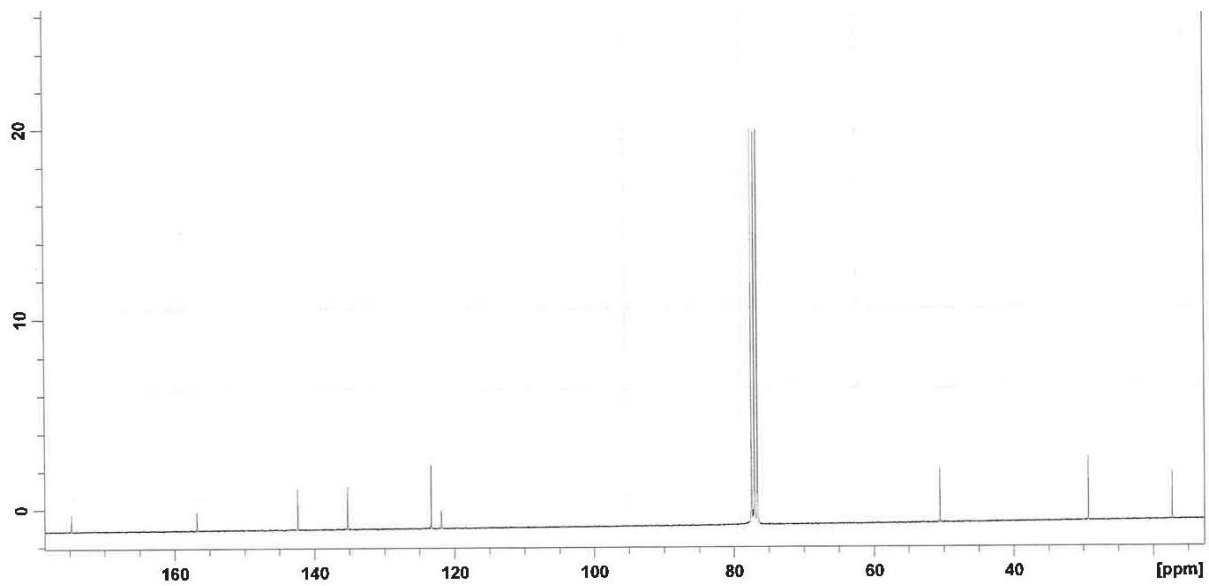

$^1\text{H}$  NMR spectrum of **3**

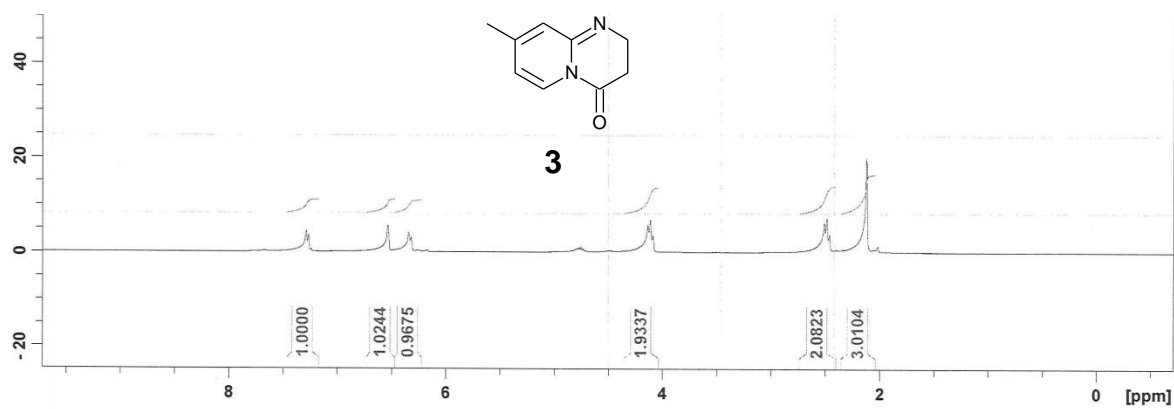

$^{13}\text{C}$  NMR spectrum of **3**

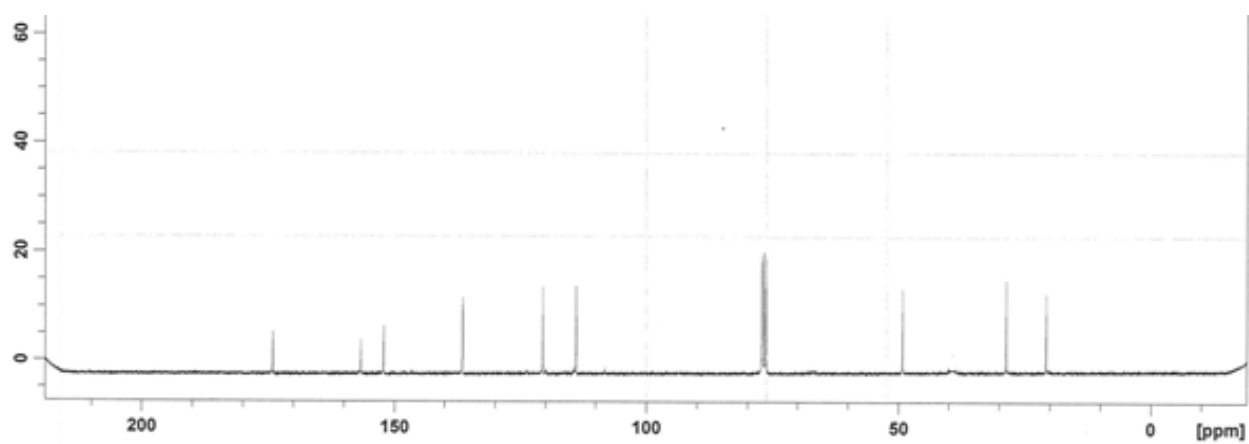

<sup>1</sup>H NMR spectrum of **4**

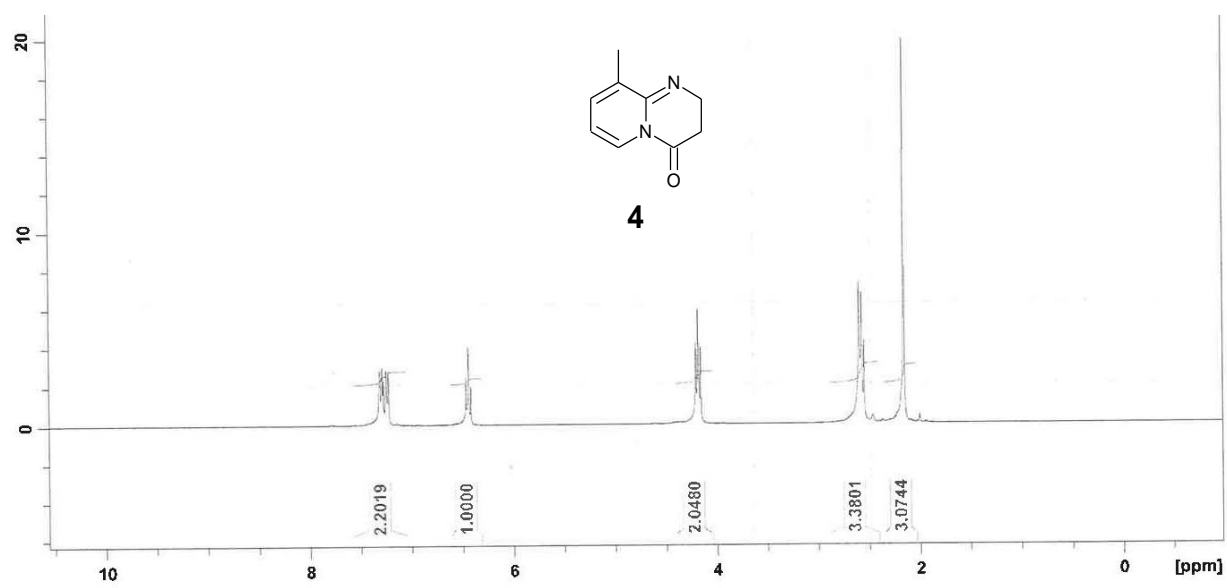

$^{13}\text{C}$  NMR spectrum of **4**

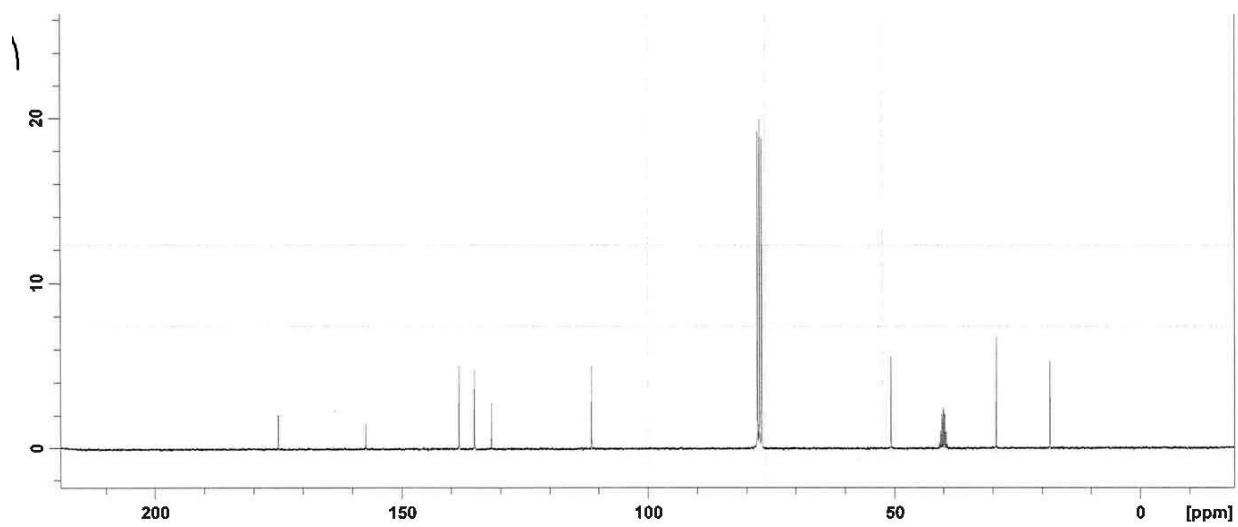

$^1\text{H}$  NMR spectrum of **5**

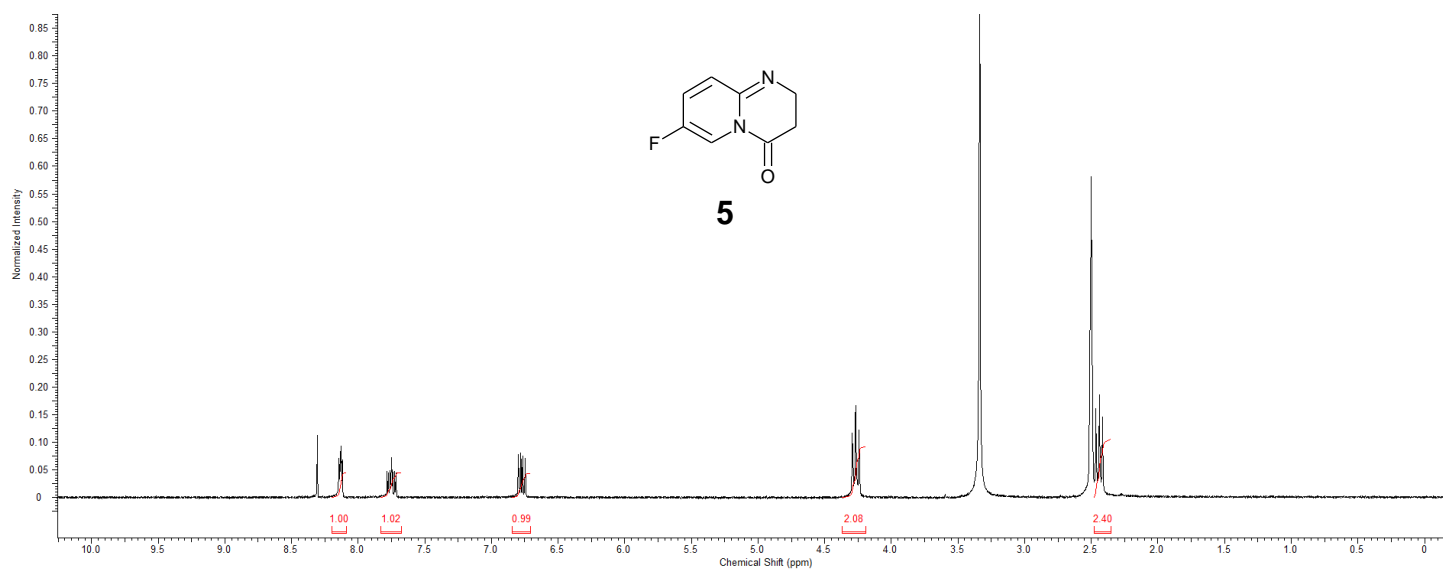



$^{13}\text{C}$  NMR spectrum of **5**

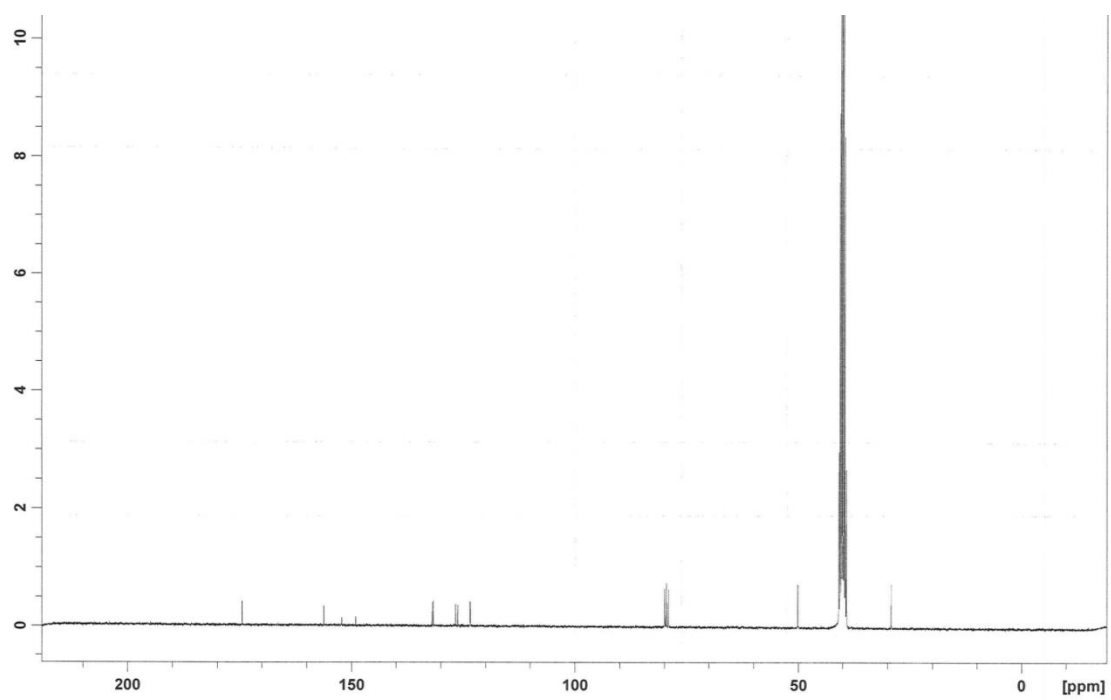

$^1\text{H}$  NMR spectrum of **6**

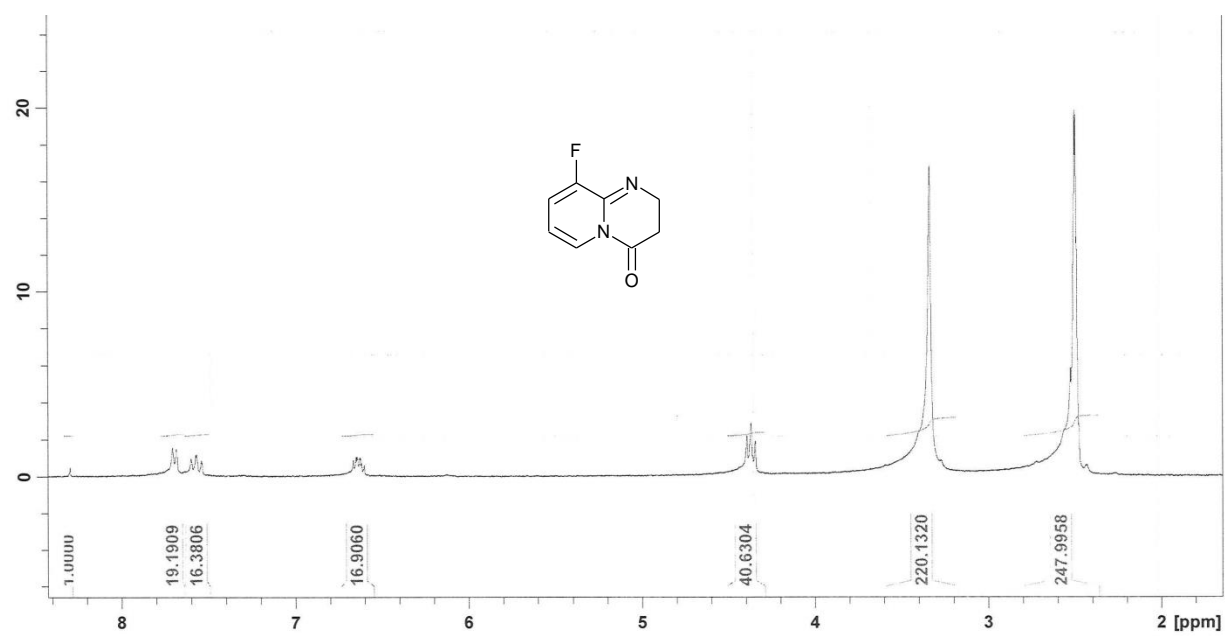

$^{13}\text{C}$  NMR spectrum of **6**

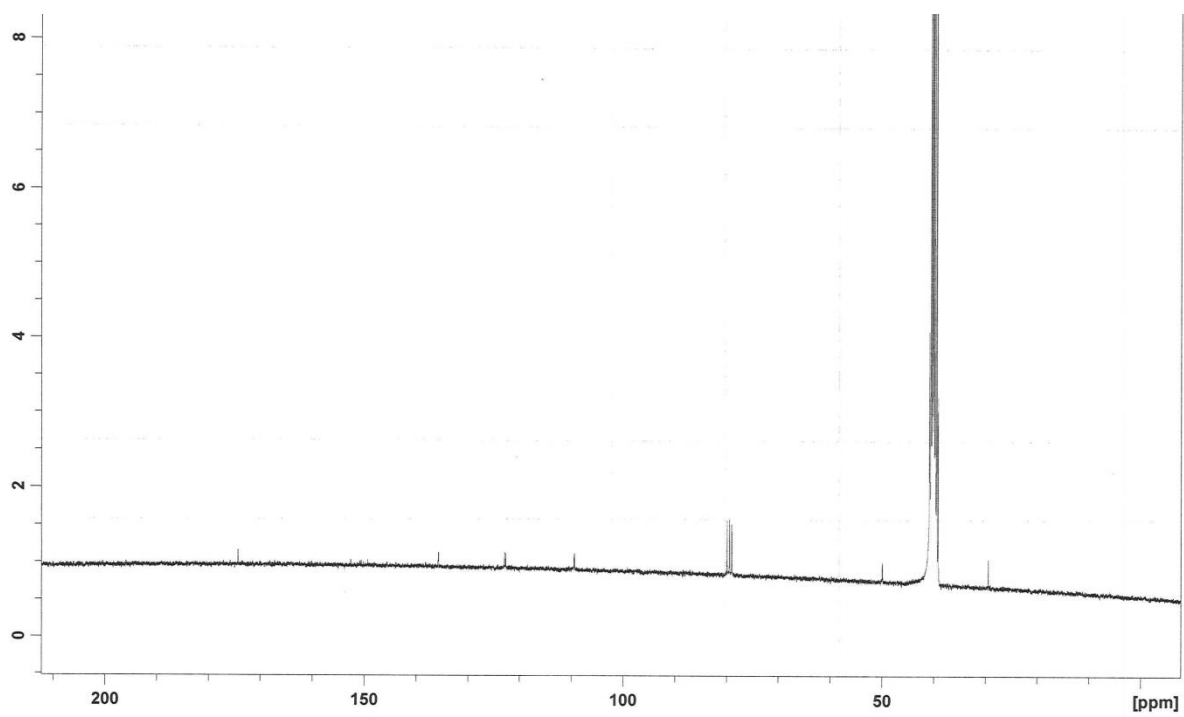

<sup>1</sup>H NMR spectrum of 7

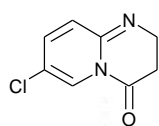

**7**

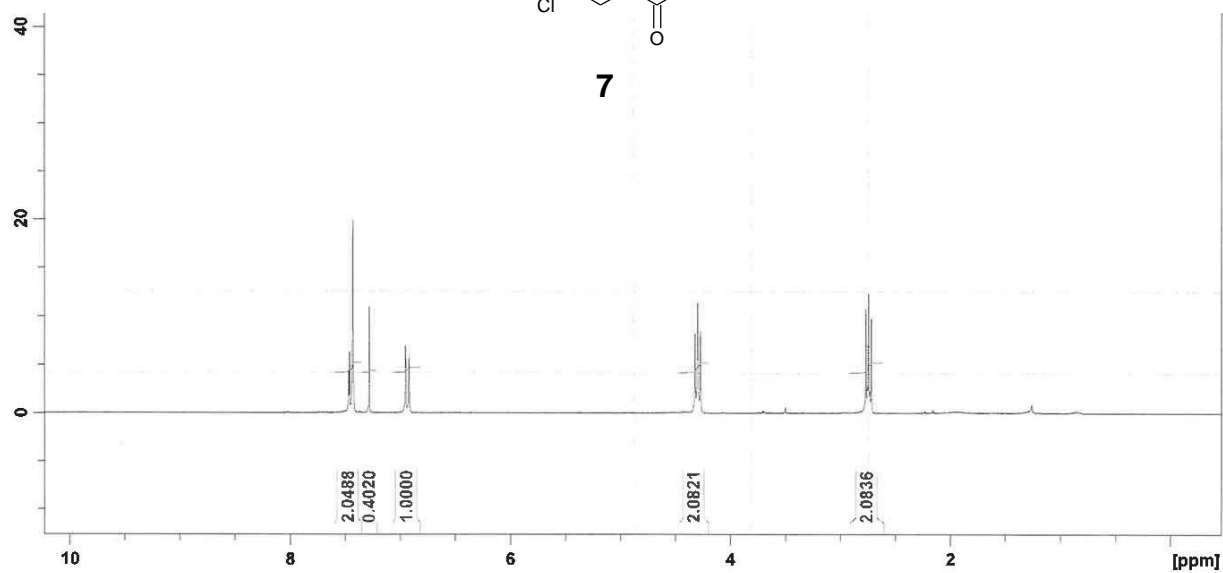

$^{13}\text{C}$  NMR spectrum of **7**

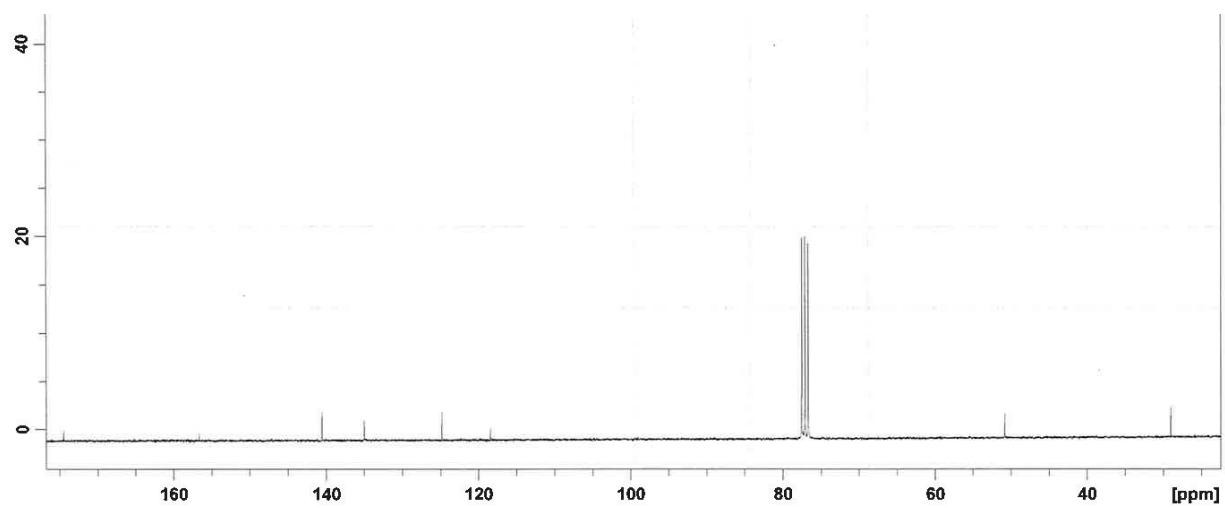

$^1\text{H}$  NMR spectrum of **8**

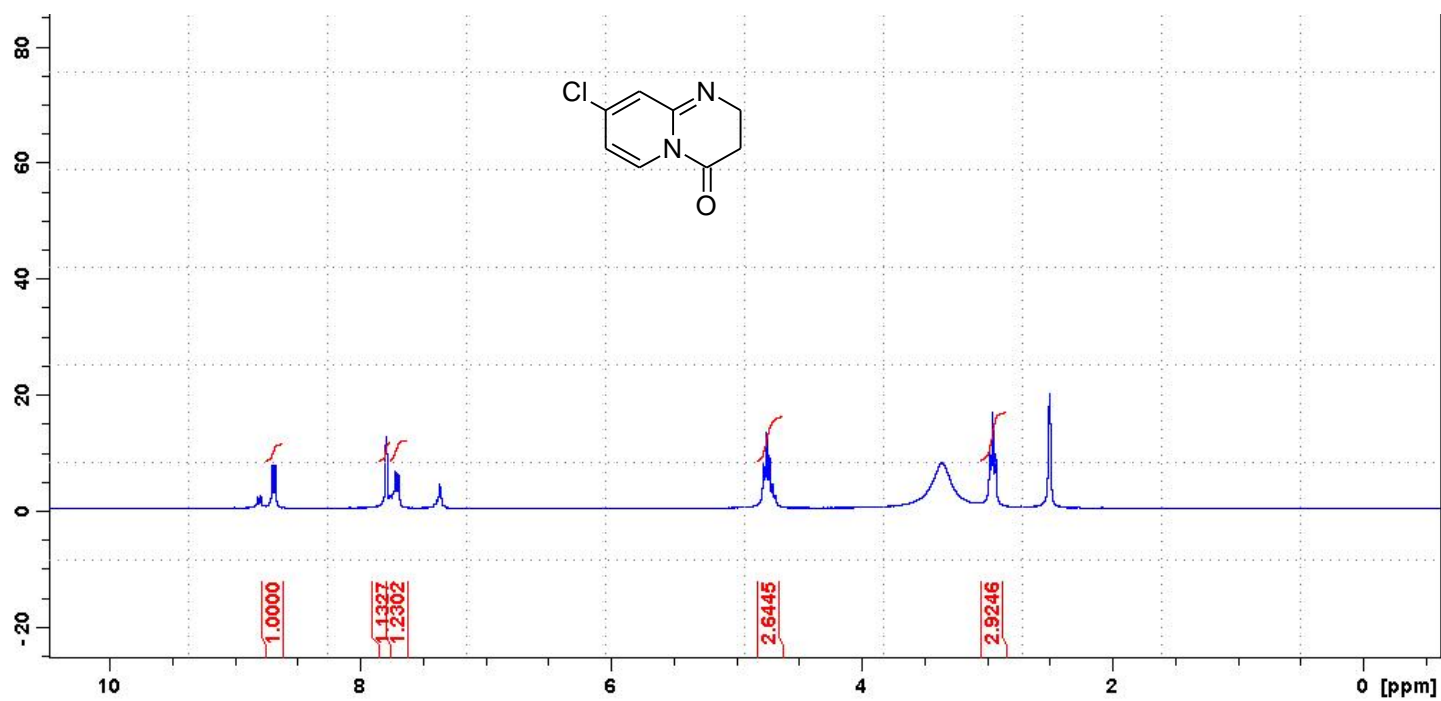

$^{13}\text{C}$  NMR spectrum of **8**

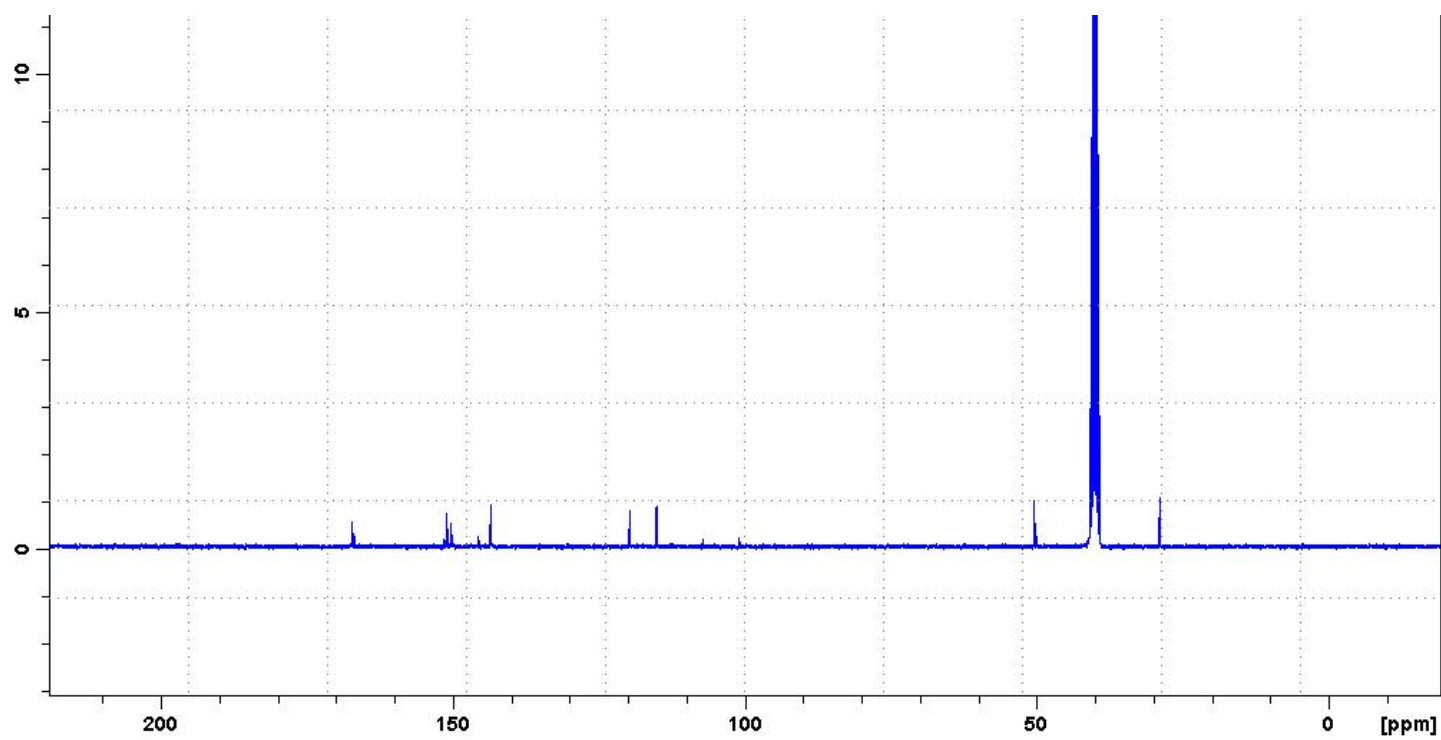

$^1\text{H}$  NMR spectrum of **9**

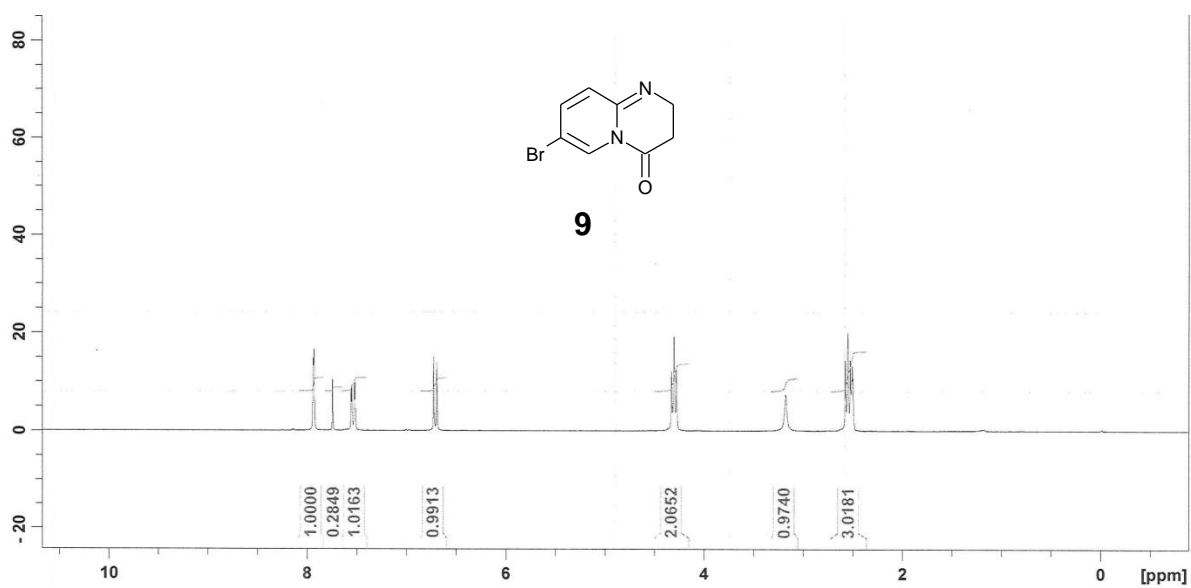



$^{13}\text{C}$  NMR spectrum of **9**

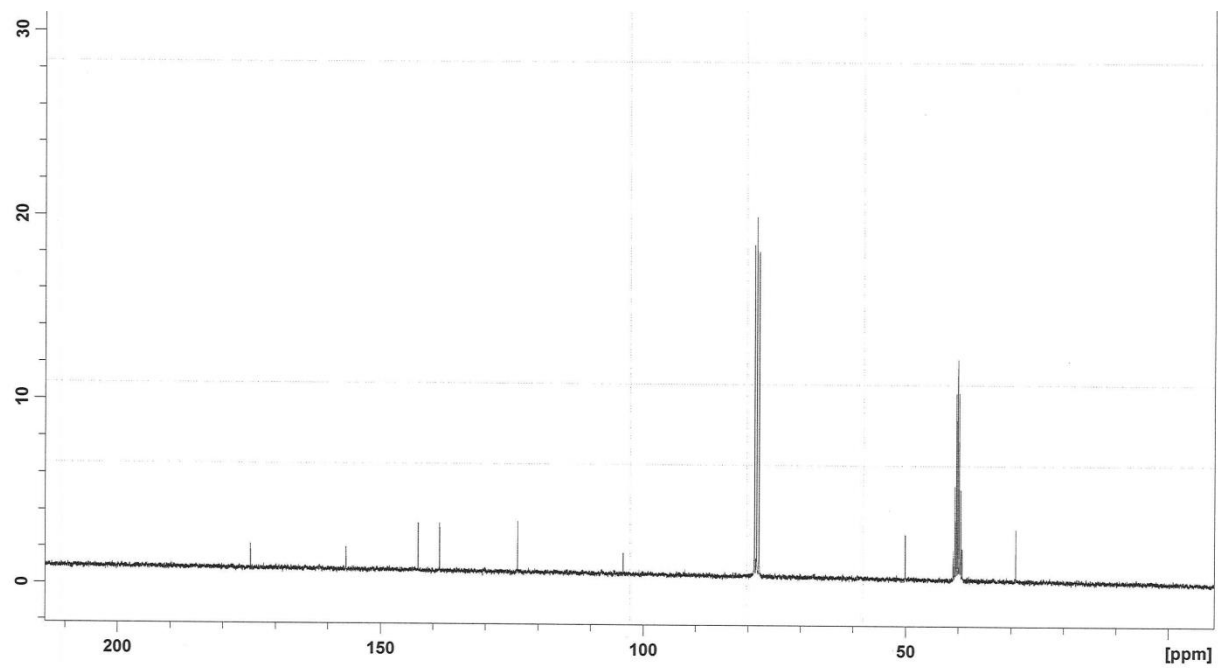

$^1\text{H}$  NMR spectrum of **10**

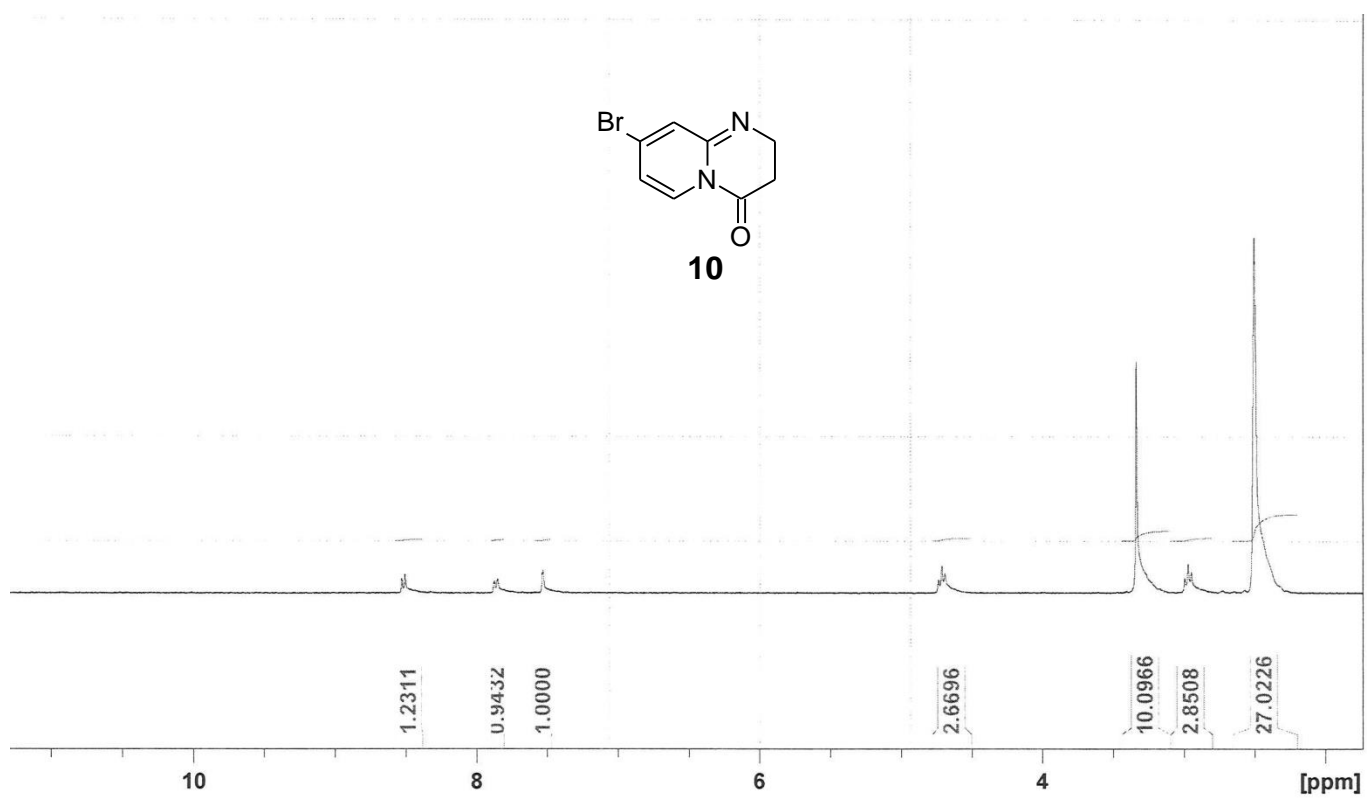

$^{13}\text{C}$  NMR spectrum of **10**

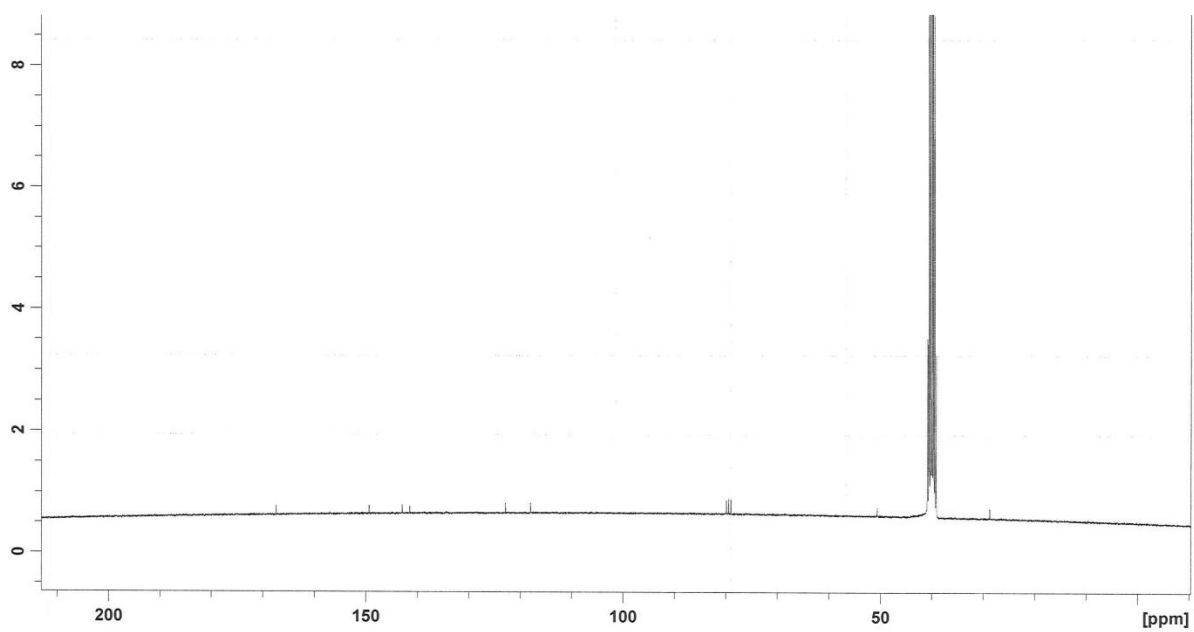

$^1\text{H}$  NMR spectrum of **11**

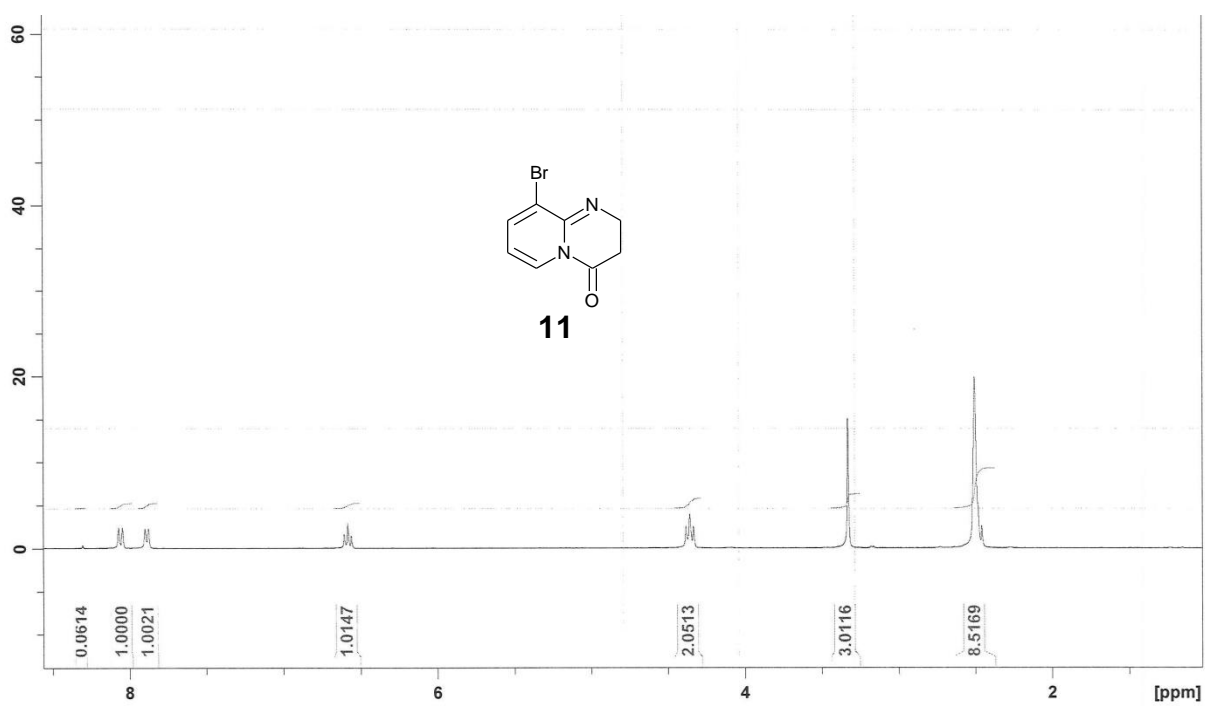

$^{13}\text{C}$  NMR spectrum of **11**

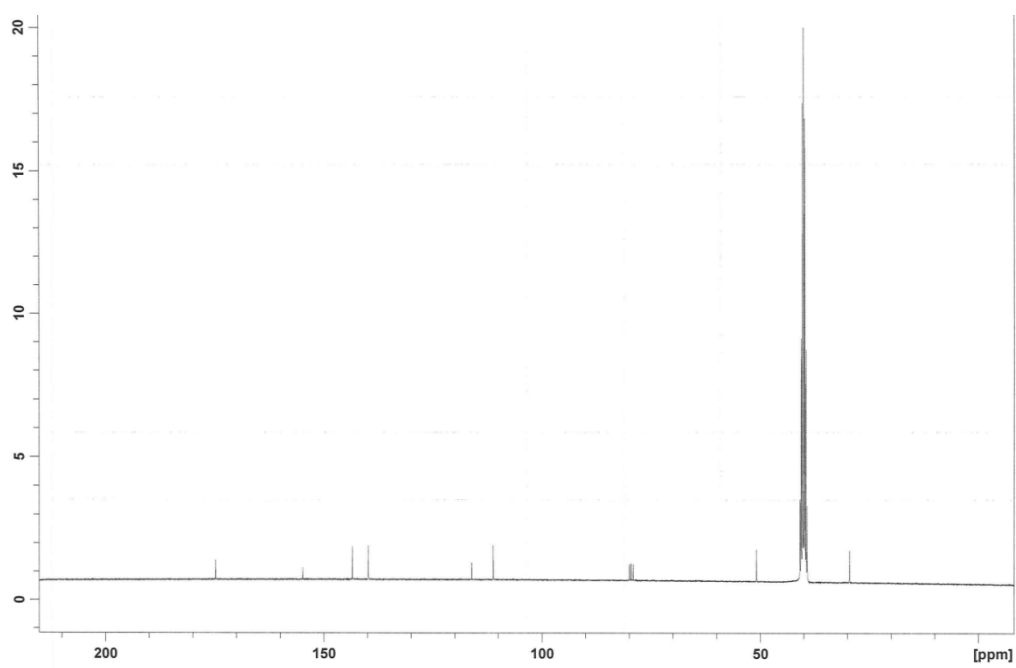

$^1\text{H}$  NMR spectrum of **12**

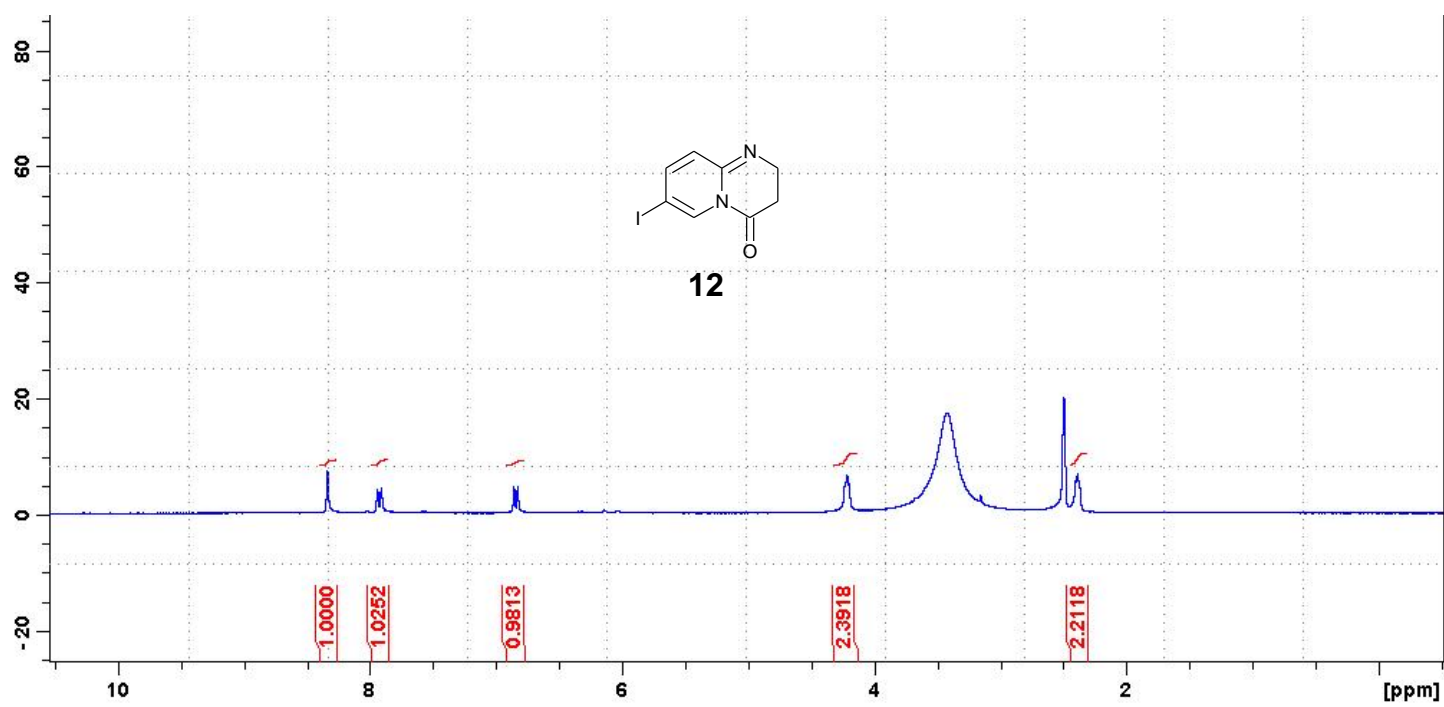

$^{13}\text{C}$  NMR spectrum of **12**

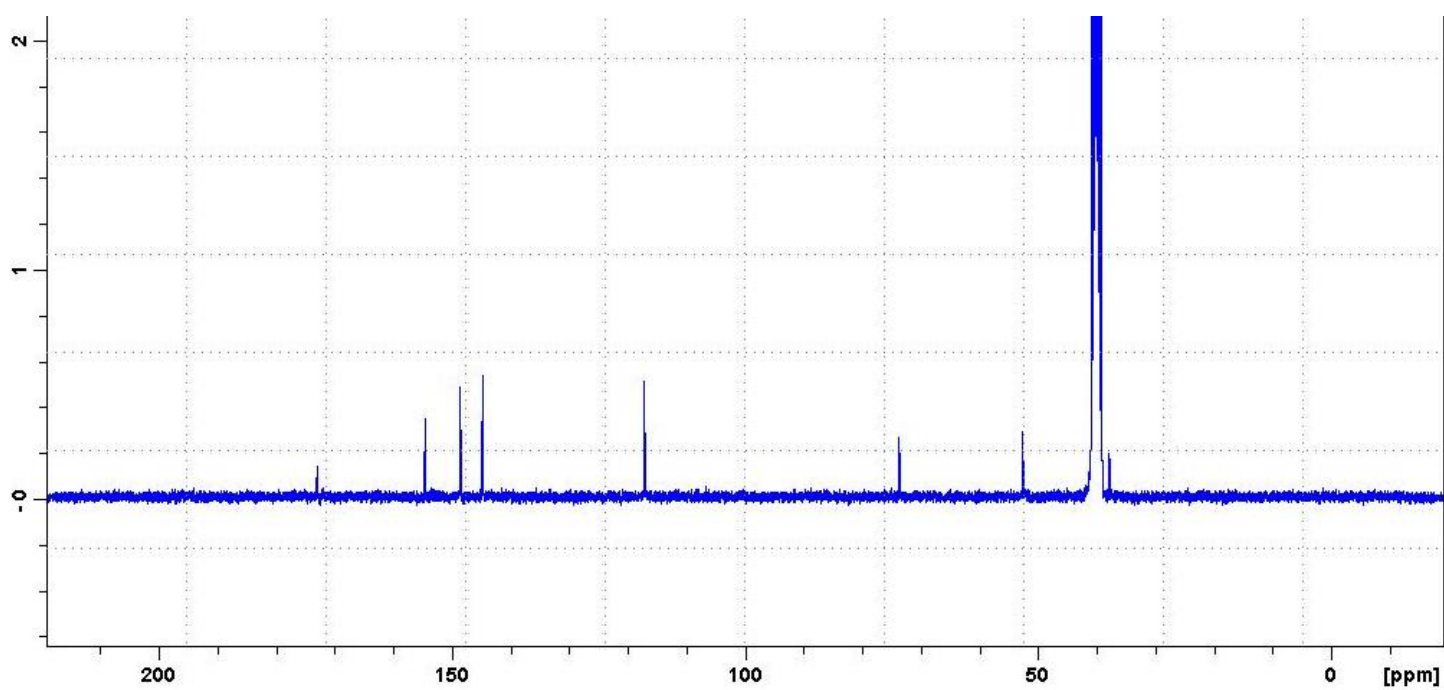

$^1\text{H}$  NMR spectrum of **13**

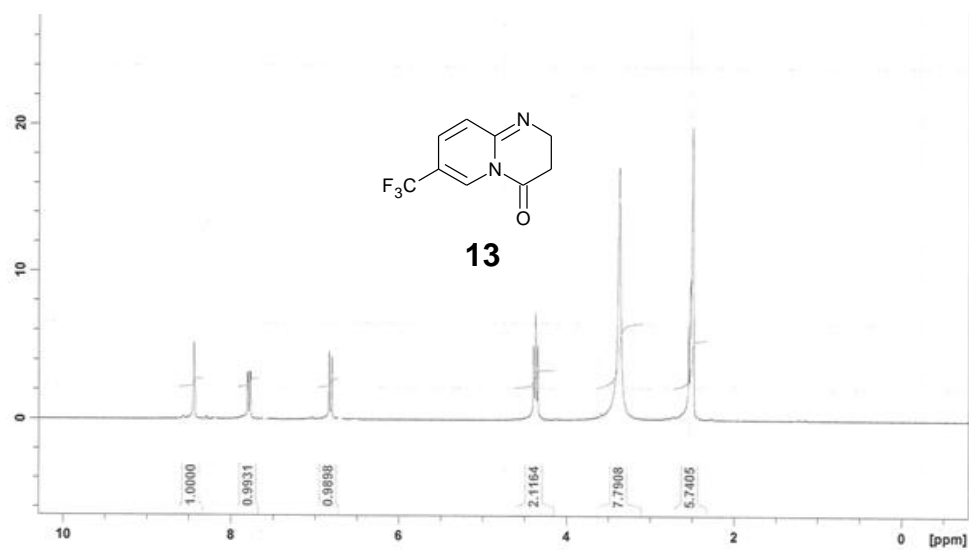



$^{13}\text{C}$  NMR spectrum of **13**

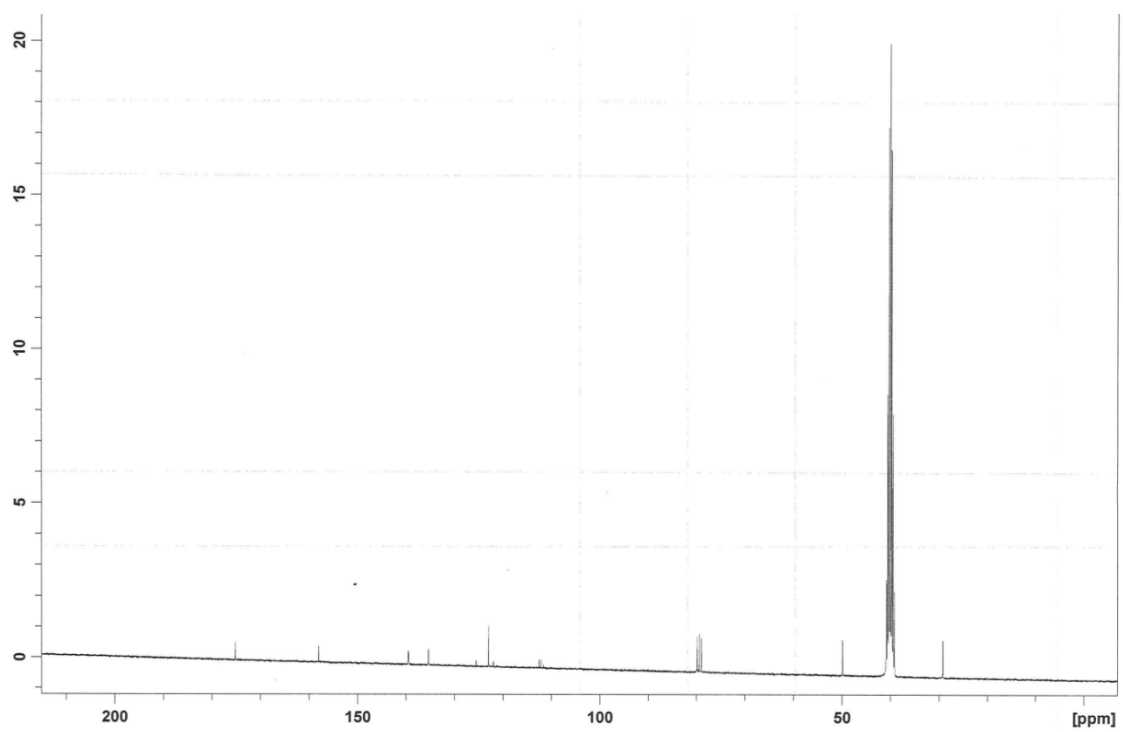

$^1\text{H}$  NMR spectrum of **14**

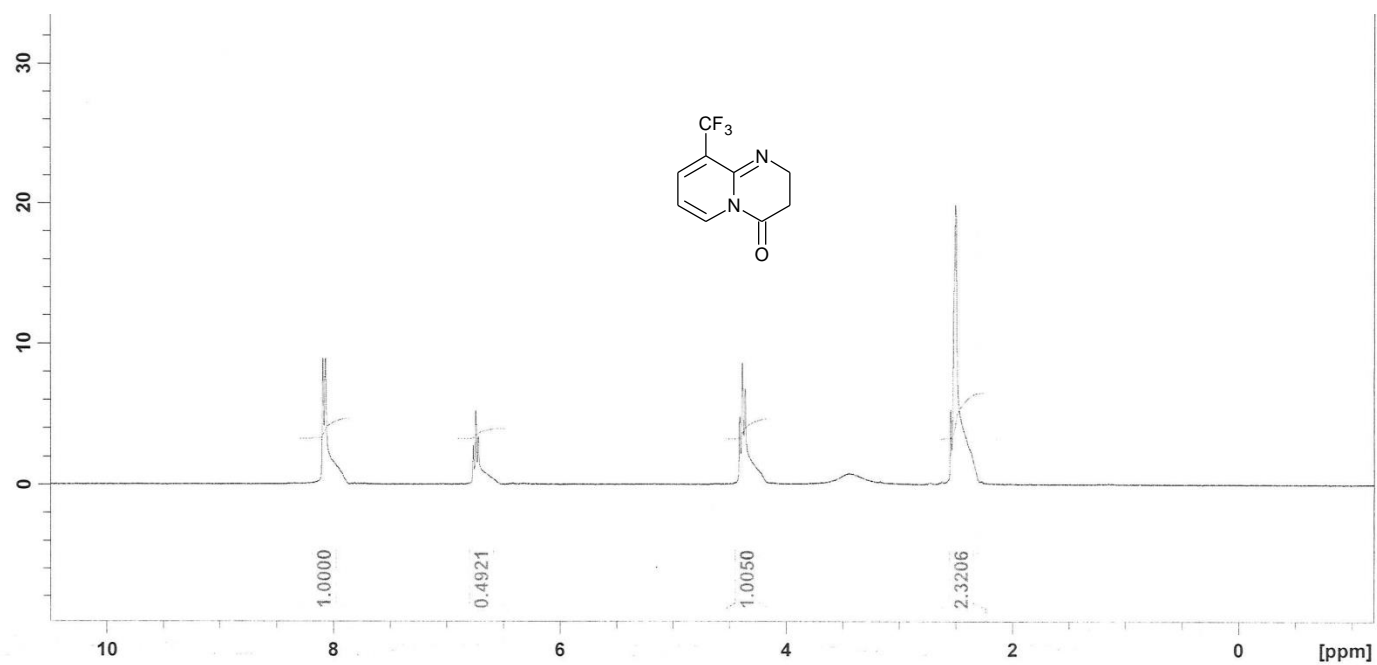

$^{13}\text{C}$  NMR spectrum of **14**

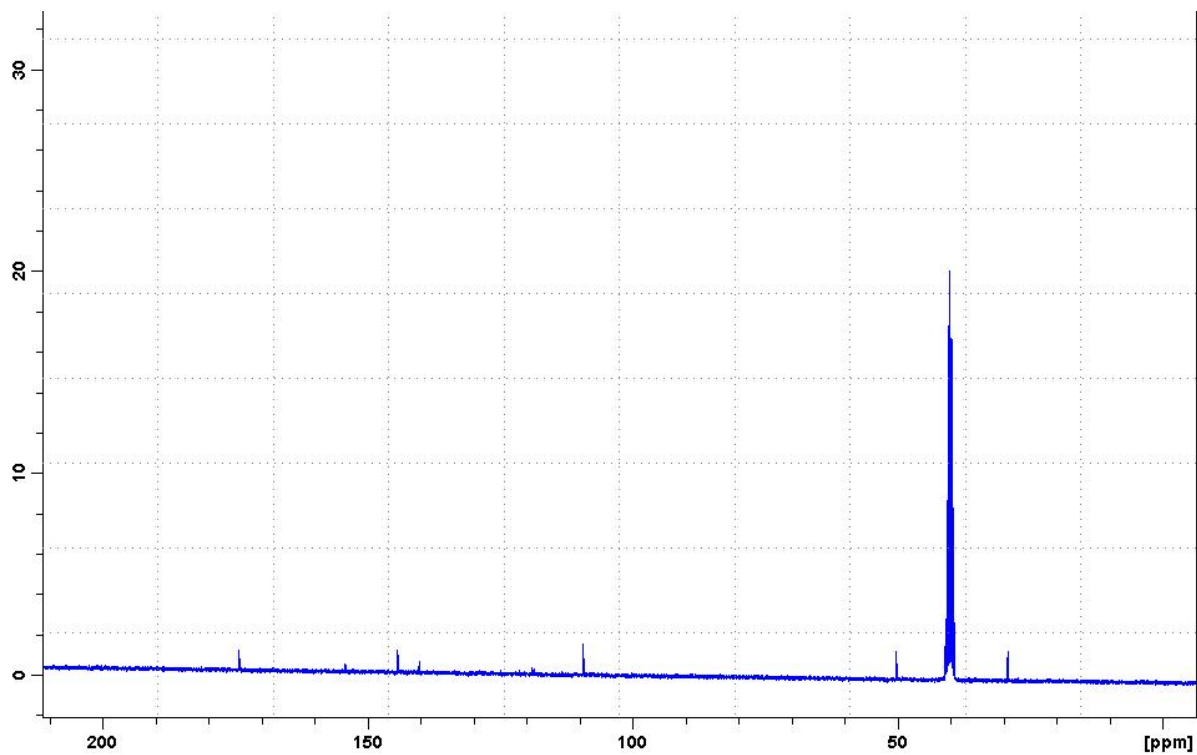

<sup>1</sup>H NMR spectrum of **15**

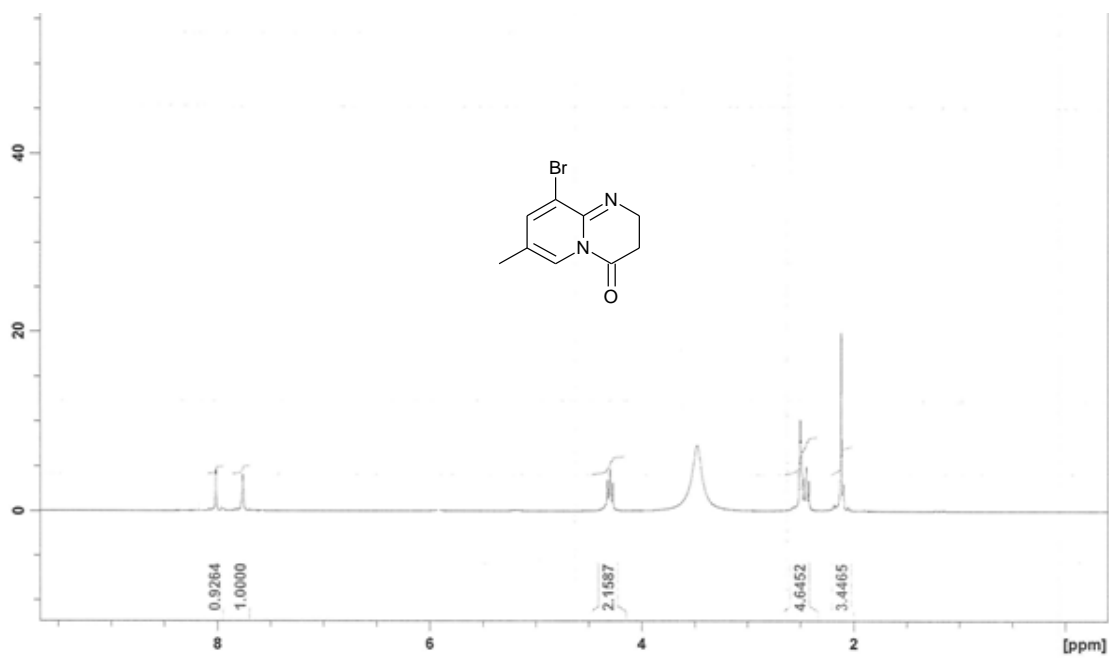

$^{13}\text{C}$  NMR spectrum of **15**

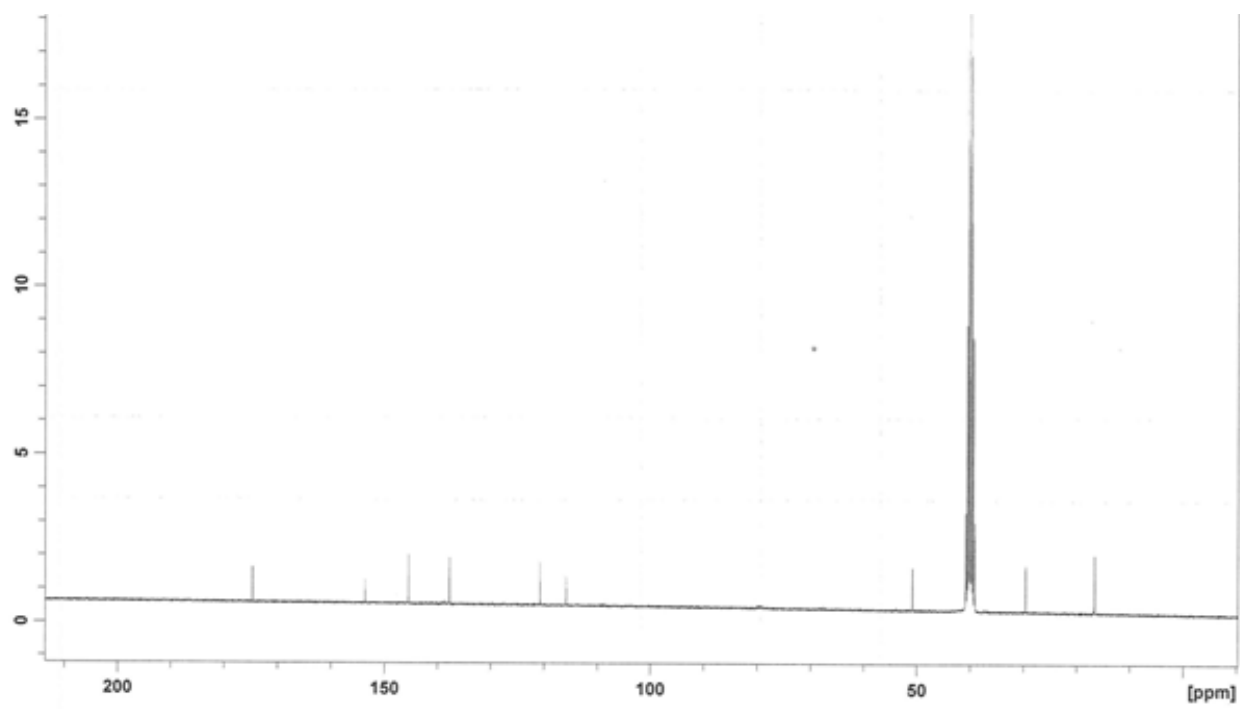

<sup>1</sup>H NMR spectrum of **16**

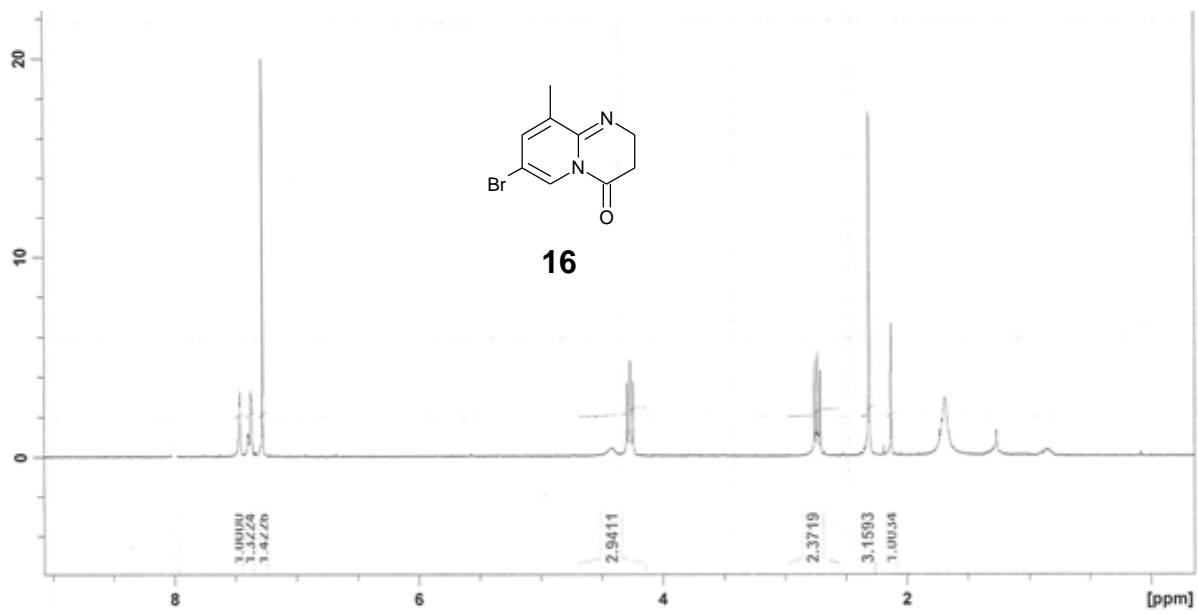

$^{13}\text{C}$  NMR spectrum of **16**

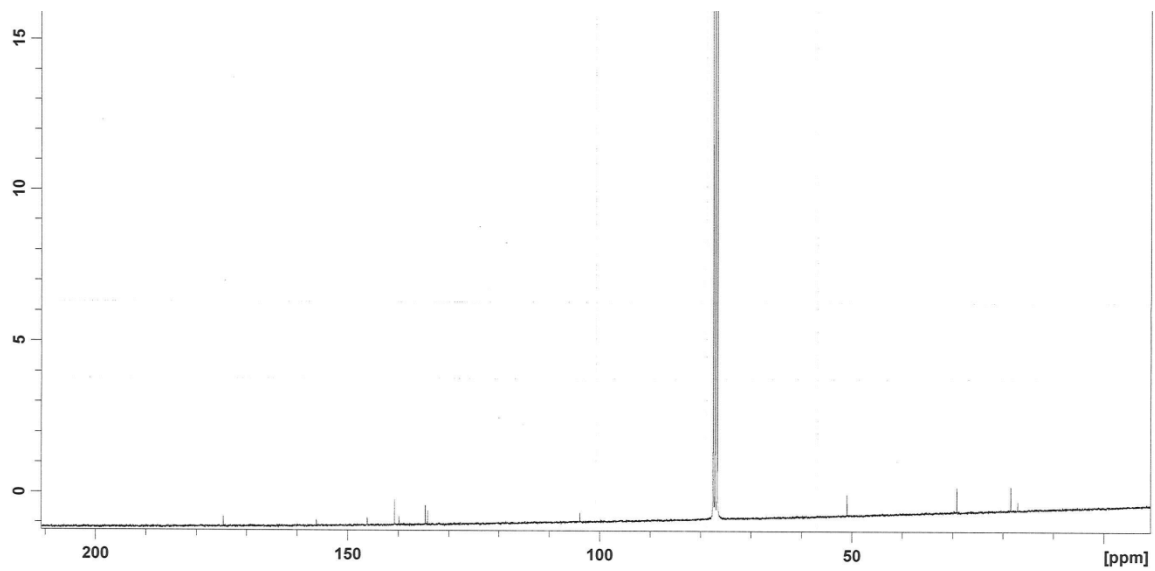

<sup>1</sup>H NMR spectrum of **17**

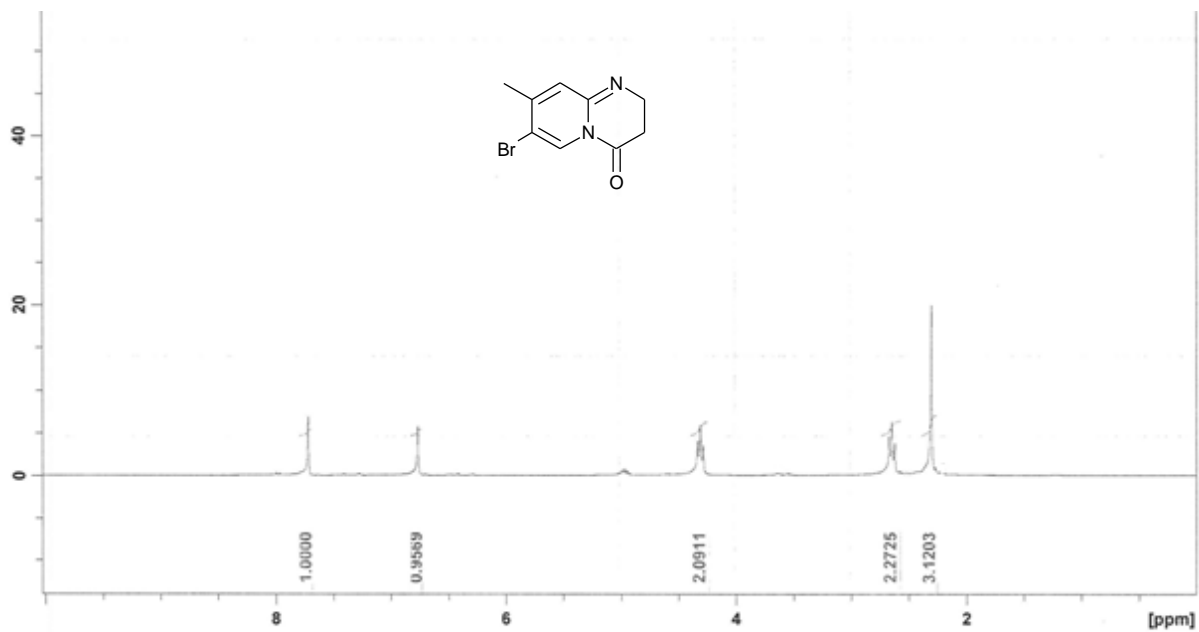



$^{13}\text{C}$  NMR spectrum of **17**

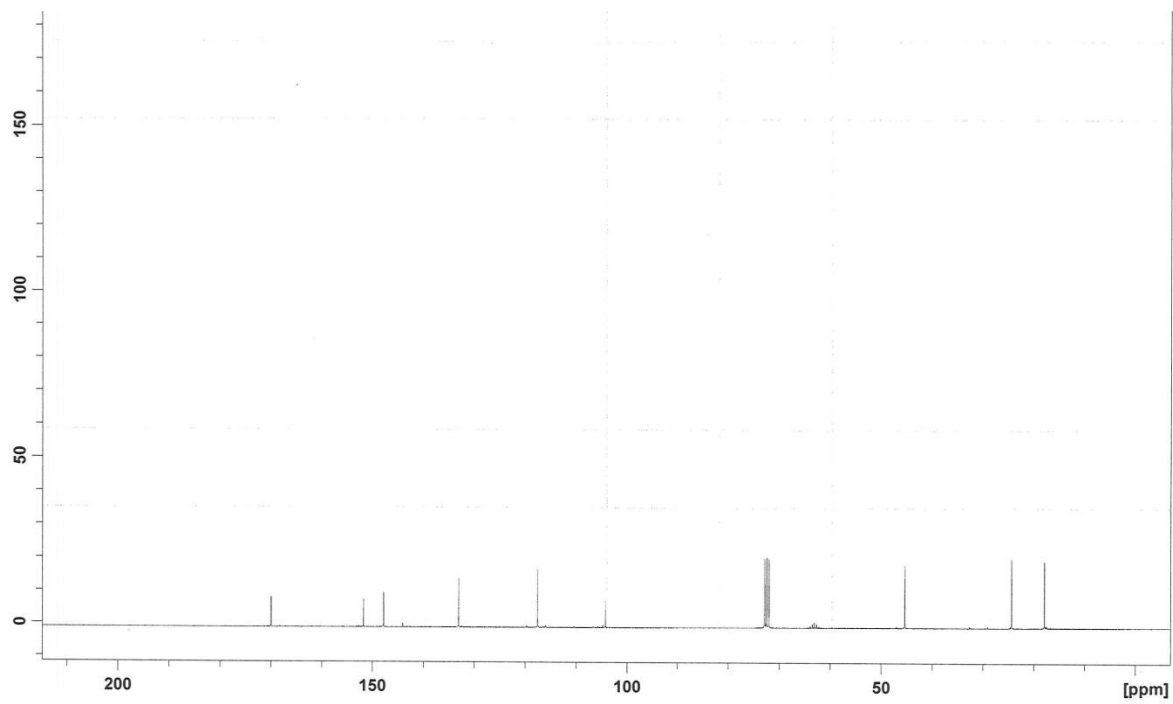

<sup>1</sup>H NMR spectrum of **18**

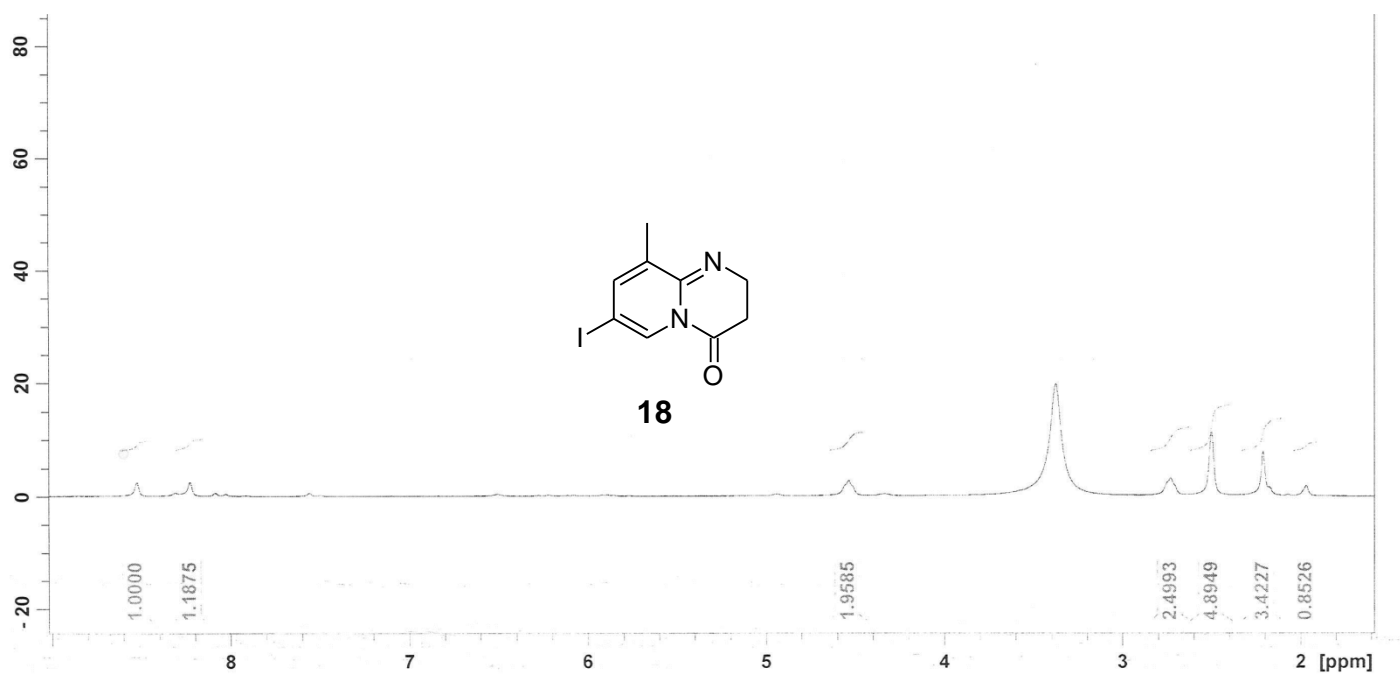

$^{13}\text{C}$  NMR spectrum of **18**

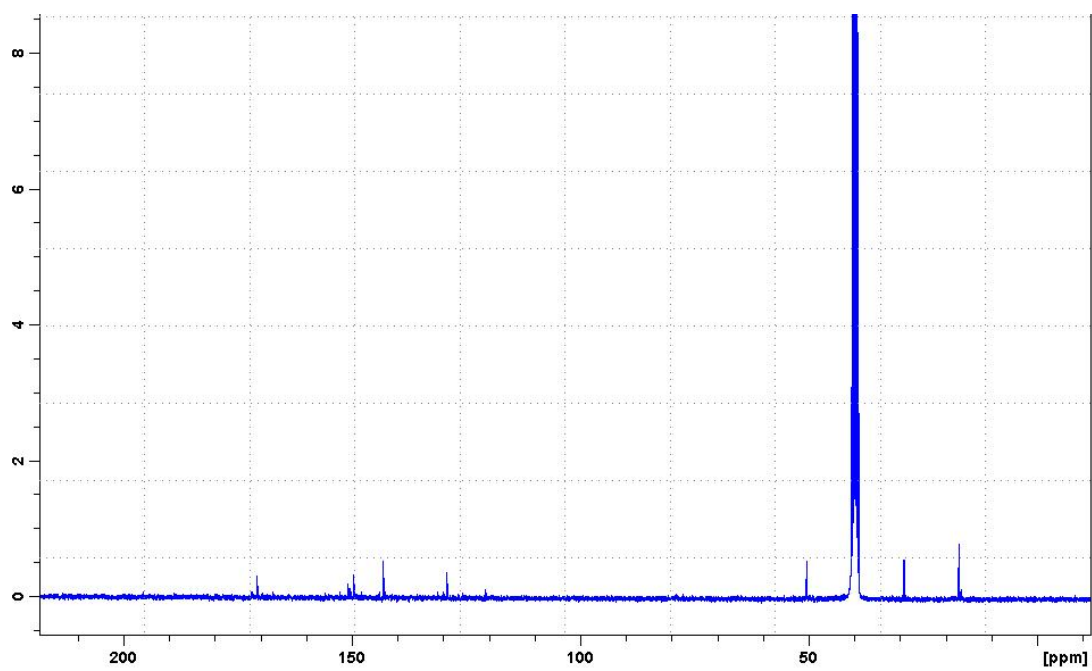

<sup>1</sup>H NMR spectrum of **19**

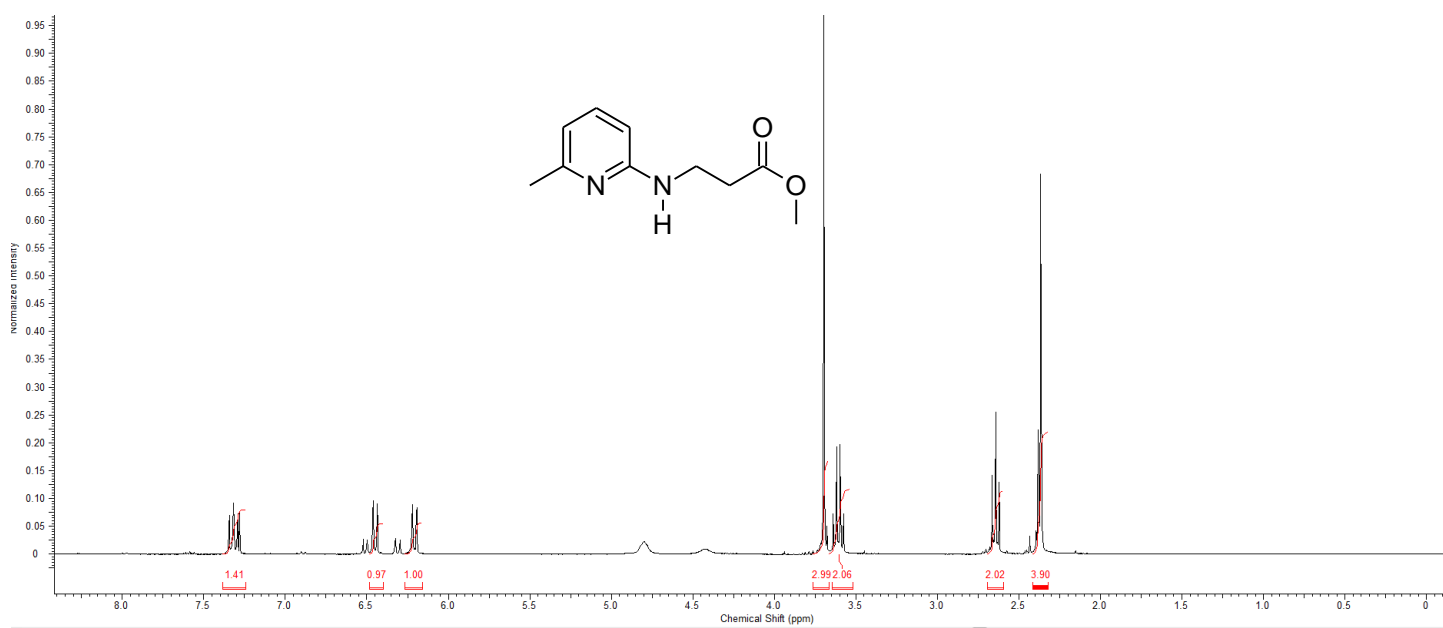

$^{13}\text{C}$  NMR spectrum of **19**

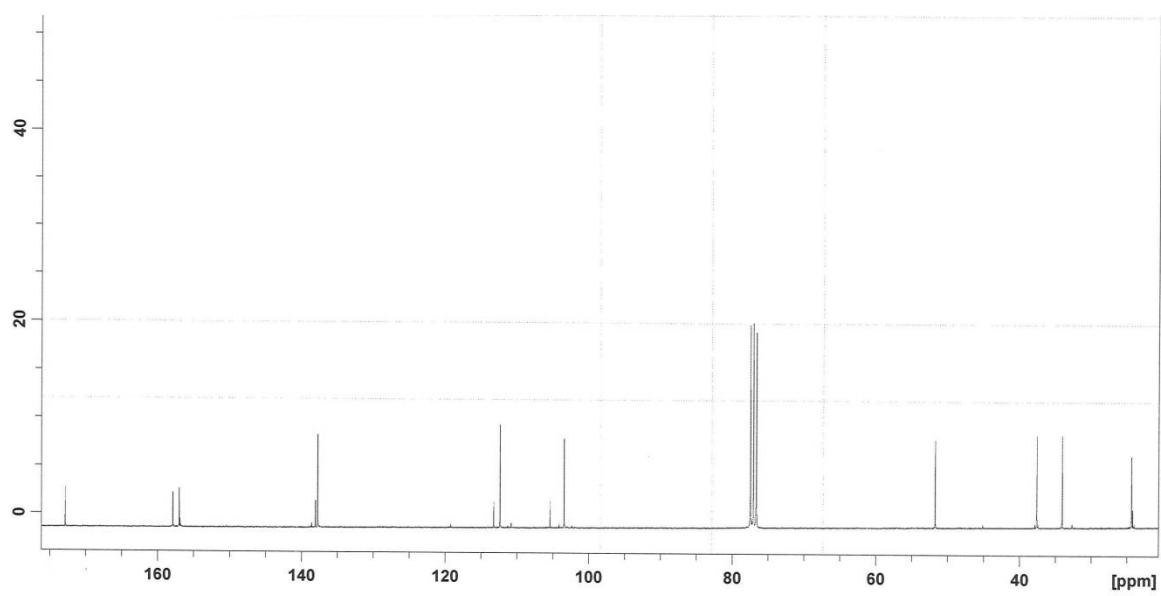

<sup>1</sup>H NMR spectrum of **20**

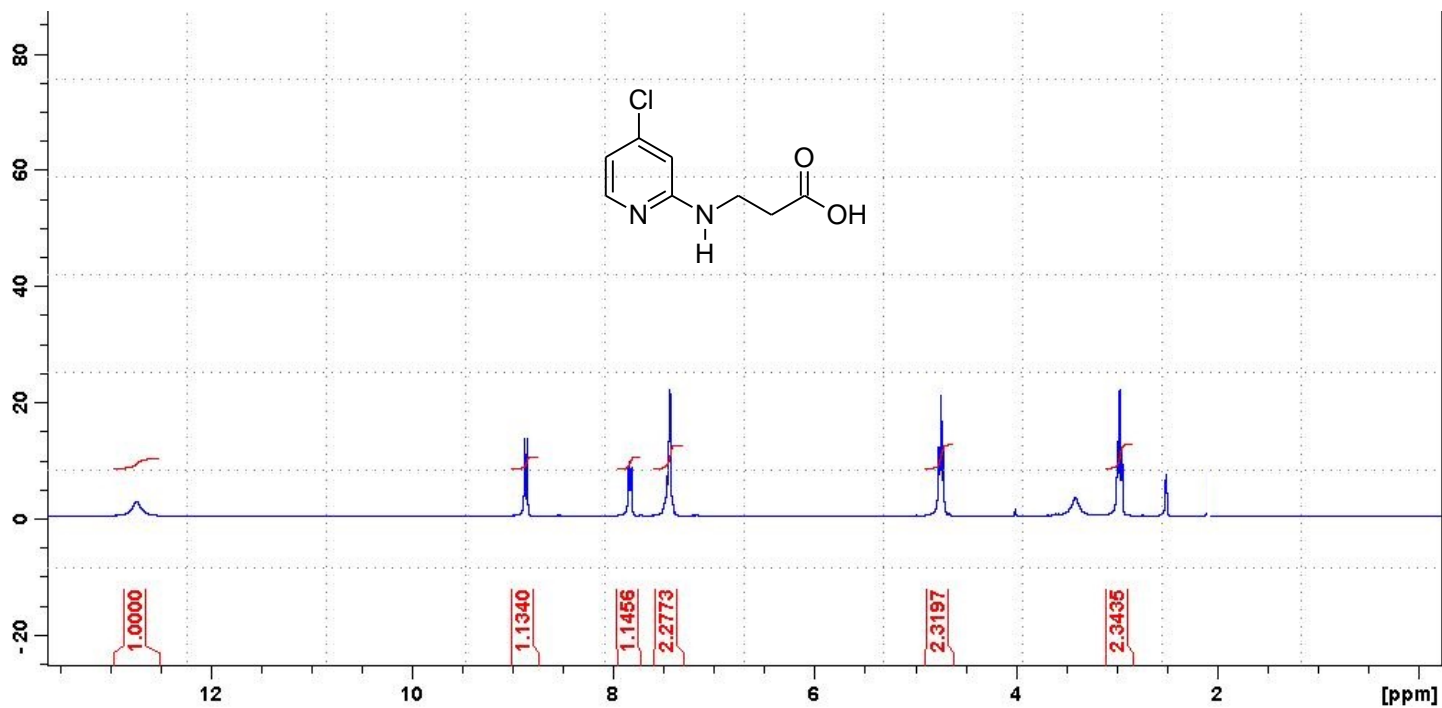

$^{13}\text{C}$  NMR spectrum of **20**

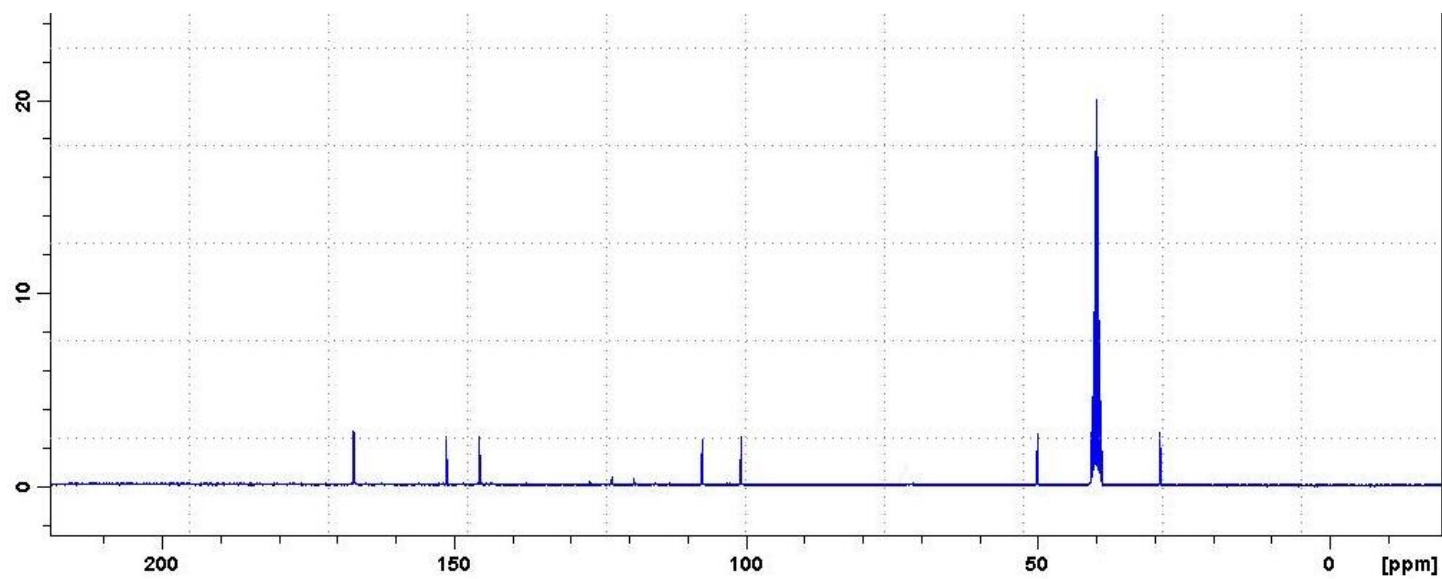

Supplement: srep36316-s1.pdf [file srep36316-s1.pdf]
